# Supplementary material for: Comprehensive analysis of tissue proteomics in patients with papillary thyroid microcarcinoma uncovers the underlying mechanism of lymph node metastasis and its significant sex disparities
Source: Front Oncol. 2022 Aug 29;12:887977. doi: 10.3389/fonc.2022.887977 (PMC9465038; doi:10.3389/fonc.2022.887977)
Supplement: Supplementary file 5 [file Table_5.xlsx]

## Sheet: Supplementary Table 5
Table S5. The DEPs between MLNM and FLNM
Uniprot ID	Protein Descriptions	Fold Change	P Value	LNM-18	LNM-19	LNM-20	LNM-21	LNM-22	LNM-23	LNM-24	LNM-25	LNM-26	LNM-27	LNM-28	LNM-29	LNM-30	LNM-31	LNM-32	LNM-33
Label	Protein Descriptions	Fold Change	P Value	MLNM-1	MLNM-2	MLNM-3	MLNM-4	MLNM-5	MLNM-6	MLNM-7	MLNM-8	MLNM-9	FLNM-1	FLNM-2	FLNM-3	FLNM-4	FLNM-5	FLNM-6	FLNM-7
O00571	ATP-dependent RNA helicase DDX3X	0.497656	0.0183937	1769.43	1714.29	1049.34	1719.2	3541.13	4635.73	3744.46	2327.2	1967.29	4664.04	3029.45	4158.25	2948.09	3658.42	6753.71	9903
O00764	Pyridoxal kinase	0.577738	0.029005	2526.22	3190.87	3139.56	1323.26	7475.72	6357.8	10533.2	4709.75	3850.25	10329.7	7835.4	6076.83	4454.44	6359.88	11335.7	11640.2
O14494	Phospholipid phosphatase 1	1.85265	0.0430652	6517.46	13450	6546.86	12517.3	4632.99	4306.95	3482.78	5647.94	5874.3	2770.72	1116.62	4346.56	5346.39	5206.41	4773.59	2878.49
O14617	AP-3 complex subunit delta-1	0.646824	0.0173928	712.274	3561.33	2909.45	2101.97	2763.36	3900.29	3968.91	1733.15	2134.02	4580.58	3907.94	2914.58	3287.52	3607.17	4247.73	6054.64
O15455	Toll-like receptor 3	1.64862	0.0444736	1790.87	2001.57	1681.32	4528.86	1217.95	3024.25	1651.66	1997.45	2491.39	1667.71	1202.79	1077.72	899.993	1137.47	2113.68	1517.94
O15484	Calpain-5	1.57271	0.0379169	6847.73	4037.35	5601.47	4192.65	3007.17	4045.67	1584.06	6332.26	6127.92	2891.01	4451.72	4052.69	1462.56	2835.73	2637.81	2328.72
O43181	NADH dehydrogenase [ubiquinone] iron-sulfur protein 4, mitochondrial	1.63043	0.00316473	16007.5	12742	12833.9	22461.8	11831.2	12384.4	13412.1	10239.1	12410.1	7938.88	10389	9233.38	8667.81	7072.27	5280.79	10724.4
O43678	NADH dehydrogenase [ubiquinone] 1 alpha subcomplex subunit 2	1.5265	0.00897797	20856.8	13462.4	13554.9	27504.7	13580.9	15449.2	16249.2	16880.1	12520.9	12689.6	11041.1	11059.3	11584.8	9327.08	8342.29	12413.7
O43708	Maleylacetoacetate isomerase	0.614438	0.00732128	943.823	1908.34	1526.67	1814.78	3031.86	1759.46	3075.19	1214.57	1862.04	3316.91	3789.82	1814	2445.45	2693.29	3842.65	3790.19
O60701	UDP-glucose 6-dehydrogenase	0.621638	0.0421601	1705.17	2354.22	2632.07	762.245	5588.71	3551.62	5994.98	4639.67	2434.56	6208.09	6073.35	4083.32	2547.94	4037.14	6572.07	7591.95
O60888	Protein CutA	0.579538	0.0273471	3091.37	2326.72	2236.62	894.749	4001.73	1562.5	6035.07	3696.65	3497.74	4096.11	4712.78	3857.78	3530	5380.35	9617.12	5502.16
O75223	Gamma-glutamylcyclotransferase	0.51118	0.0366074	2894.97	13575.5	3227.25	3297.8	11055.8	9500.76	10164.7	4418.28	3239.09	20765.7	24679	9748.54	10002.4	14770.2	6529.02	6888.13
O75323	Protein NipSnap homolog 2	0.614995	0.00719299	2620.42	2482.14	2226.49	2487.19	3679.8	3116.8	4954.56	3995.33	5430.33	7807.24	3405.55	3793.87	6810.9	5220.89	6413.6	5744.54
O75380	NADH dehydrogenase [ubiquinone] iron-sulfur protein 6, mitochondrial	1.66515	0.0175526	19900.8	9708.53	12629.1	22846.3	9656.6	10621.9	12309.4	10961.3	9726.01	9085.08	10342.1	8723.02	4967.06	6271.03	6683.25	9213.35
O75874	Isocitrate dehydrogenase [NADP] cytoplasmic	0.551281	0.023391	2248.06	3675.53	5730.26	3494.48	12275.1	9449.59	13545	5615.13	5182.44	14231.2	10507.2	9091.21	5556.94	10876.3	17300.5	18802.8
O76027	Annexin A9	0.538067	0.0119666	1166.92	9236.42	4688.32	2071.05	5833.59	4002.38	1855.97	3182.27	5875.38	9866.07	8957.71	7630.33	9713.66	8154	7755.53	2725.1
O94880	PHD finger protein 14	1.61744	0.0267712	2574.81	4999.91	3366.02	5469.06	2747.77	3134.73	3630.4	2586.63	2023.95	2158.27	1606.41	3311.54	988.337	2488.34	1235.86	2893.74
O95182	NADH dehydrogenase [ubiquinone] 1 alpha subcomplex subunit 7	1.50531	0.0178454	11350.1	6997.46	4936.91	13946	7499.24	8892.28	10876.5	7049.67	8563.77	5413.77	5765.41	6267.81	5327.1	4260.33	6311.39	8047.01
O95219	Sorting nexin-4	0.645859	0.0340392	1171.34	2007.24	1705.51	524.538	4063.95	2861.09	2707	2541.69	2013.44	3081.32	4179.6	2722.95	1818.61	3013.43	4425.39	4356.97
O95571	Persulfide dioxygenase ETHE1, mitochondrial	0.344161	0.00241492	2604.94	3781.27	969	4669.14	3726.89	4853.6	10356.9	4222.44	3553.67	19590.3	10096.7	8628.48	18056.4	17123.2	2749.21	11300.2
P00338	L-lactate dehydrogenase A chain	0.53233	0.0142468	2359.86	2388.71	4800.48	3343.27	7944.16	9907.8	12637.6	6096.32	4556.94	13321.8	11995.3	7887.83	6169.58	10276.4	10779.7	18519.1
P00441	Superoxide dismutase [Cu-Zn]	0.573919	0.0214991	11378	15773.2	18575.3	9954	23789.7	19783.4	46171.7	21984	12748.4	52337.5	42692.3	28955.2	23520	25354.8	24561.8	46729.4
P00505	Aspartate aminotransferase, mitochondrial	0.651976	0.0136145	6384.47	2787.87	3421.33	7295.62	4582.99	6739.26	10380.6	5988.15	7535.2	11690.3	6987.37	6473.77	12179.7	11003.8	8262.72	9152.53
P01033	Metalloproteinase inhibitor 1	0.269211	0.0207243	4778.8	6775.35	4006.98	811.269	10055.2	5237.51	3256.81	11309.8	2078.23	36045.9	46798	22596.4	7372.96	17113.8	7541.54	2103.8
P01597;P04432	Immunoglobulin kappa variable 1-39;Immunoglobulin kappa variable 1D-39	2.1551	0.0493641	1212.04	9096.49	20145	4298.91	12503.2	7626.44	20477.8	18431.7	20782.5	960.366	2828.09	5321.14	3554.32	6509.91	12681.1	9494.97
P04181	Ornithine aminotransferase, mitochondrial	0.633579	0.0136056	2583.91	1197.45	1868.55	2155.96	2524.02	2366.57	5030.86	4311.52	5464.37	5787.08	3234.95	4645.75	4921.11	4902.41	5066.01	5205.47
P04264	Keratin, type II cytoskeletal 1	2.49712	0.00342343	18078.8	12080.5	18002.8	32042.1	21226.7	30606.3	16286.2	24556.8	7529.57	17044	8297.22	4213.53	10243.1	3898.02	5848.08	6648.15
P04908;Q7L7L0;Q93077	Histone H2A type 1-B/E;Histone H2A type 3;Histone H2A type 1-C	1.58877	0.0446611	15342.4	6217.7	10154.8	16838.3	7164.08	10794.8	5264.62	9333.06	6355.71	5961.16	4870.06	5778.64	6437.82	5550.8	9254.34	4965.59
P05156	Complement factor I	0.565323	0.0161198	8895.18	2843.55	2669.4	2526.11	7336.38	4618.91	4792.75	8836.87	2452.94	8137.82	11186.6	8932.16	5917.35	9004	13559.6	5135.55
P06681	Complement C2	0.598235	0.0405497	2554.79	1382.13	847.606	3213.36	2470.18	1745.36	2119.05	978.733	3344.65	2967.96	3837.66	3020.6	1451.56	3461.23	6547.62	2968.23
P06703	Protein S100-A6	0.437428	0.00106553	11635.4	32066.4	19670.7	7948.99	39792.9	19314.5	22808.3	15042.8	15219.3	60001.5	50624.5	49599.1	24005.8	64880.8	50004.1	27158.7
P07108	Acyl-CoA-binding protein	0.449537	0.0249154	4470.29	2234.04	3686.46	2076.31	5289.83	5911.77	12976.5	2818.05	2110.62	15139	12270.7	4972.26	6029.29	12110	3370.09	18038.8
P07225	Vitamin K-dependent protein S	0.397401	0.0231703	5932.42	7740.66	2626.93	3582.98	5226.63	4714.39	935.729	8208.03	3370.5	19215.8	23823.4	8484.46	14105.4	11937.3	3981.38	1315.08
P07858	Cathepsin B	0.590861	0.00861115	24279.7	33794.2	27445.4	8664.18	30080.4	29131	28377.8	40963.3	28888.9	58346.7	49575.6	26364.9	62214.2	56450.4	56695.1	21578.5
P07942	Laminin subunit beta-1	1.90859	0.0395483	55256	27179.5	35006.7	16147.6	24973.4	11651.2	9528.94	34243.1	34800.8	16201.7	25686.2	13204.7	12439.3	14659.9	13839.9	5352.84
P07988	Pulmonary surfactant-associated protein B	0.379279	0.00702457	1352.37	3098.71	3384.97	3142.73	8978.53	3733.64	6732.46	10001.7	3278.82	8971.69	19129.4	22227.4	6305.92	17362.6	11150.5	4474.86
P08842	Steryl-sulfatase	0.463591	0.0100767	2518.07	4148.88	2569.79	2519.37	1659.8	1106.94	2011.69	2511.74	2421.89	2726.51	4426.99	2550.47	5438.12	3407.86	8897.7	8570.02
P09467	Fructose-1,6-bisphosphatase 1	0.521269	0.0193502	1557.4	4366.27	4108.34	874.67	4981.44	4517.9	11029.3	5035.3	2702.35	8130.69	5894.06	5181.45	13151.6	10008.8	5215.63	10867.1
P0C0L4	Complement C4-A	0.418525	0.00549268	9906.56	9236.48	8107.57	5736.46	19820.2	10604.1	8675.41	17918.1	7308.91	32242.2	32169.9	15932.2	17384.2	21241.3	48947.4	12928.8
P0C0L5	Complement C4-B	0.479853	0.00981528	6854.84	4641.37	3909.53	3342.66	13248.6	7980.87	13520.1	8237.53	5413.21	10968.4	9553.84	14257.9	13618.6	9771.95	26741.1	23927.3
P11047	Laminin subunit gamma-1	1.94282	0.0306673	70737.8	36431.9	42648.9	20393.4	31699.1	17262	12330.8	43646.1	42783.9	19607.4	30439.6	15977.2	16712	17360.6	19819.4	7363.59
P11498	Pyruvate carboxylase, mitochondrial	0.484183	0.0097393	2759.59	7463.7	1819.22	1507.94	3063.69	2313.59	2718.51	3502.36	2996.35	9253.88	6344.87	5829.33	9603.37	8060.32	3497.78	2621.74
P12035	Keratin, type II cytoskeletal 3	1.8541	0.00754889	5324.26	8623.96	6033.73	9840.31	7420.19	11940.7	11989.5	9381.11	4235.6	6714.04	4198.73	2854.48	6891.85	5104.08	1874.37	3735.95
P13645	Keratin, type I cytoskeletal 10	2.50513	0.00212209	14028.6	19251.7	15446.8	23778.7	19303.7	22871.1	21910.2	29376.9	6125.94	17504.7	6879.98	2557.84	10933.8	3335.61	5610.28	6608.33
P13797	Plastin-3	0.632948	0.0280108	3882.14	8489.83	5390.55	2202.67	10775.4	5506.75	8261.15	6320.03	4813.75	12708.4	15189.3	8613.49	5304.46	9694.45	8803.68	8060.49
P14136	Glial fibrillary acidic protein	2.79032	0.0343195	10897.2	5008.1	1872.11	2503.62	4073.62	6083.34	436.822	3319.49	4311.92	1594.11	749.441	1745.03	756.465	2959.89	1426.8	1501.54
P14174	Macrophage migration inhibitory factor	0.464224	0.019074	15320.9	15652.5	21788.1	9439.74	72757.3	46265	99489	33675.7	20750	110645	77804.1	47136.2	35207.5	70928.1	133892	85889.1
P14543	Nidogen-1	1.86281	0.0312891	41564.2	19976.2	25791.2	18867.6	22301.4	14663.9	11410	33116.4	48825.9	11888.8	18727.4	11281.9	12902.6	16314.2	21885.2	5752.36
P15289	Arylsulfatase A	0.582152	0.0432812	5957.22	1711.58	1540.89	4383.92	3455.73	1472.62	14950.7	5902.65	7884.87	9000.37	10442.3	6525.38	10578.5	9758.53	8113.46	8722.97
P16870	Carboxypeptidase E	0.394158	0.0362262	3671.08	2464.88	3050.75	2457.81	4042.81	2903.4	3621.74	4932.28	1880.67	16523.4	17033	6710.02	2534.57	3005.11	9248.77	2219.88
P16930	Fumarylacetoacetase	0.529209	0.00173091	1578.22	3182.66	2276.98	3606.75	4300.63	3903.4	3369.03	1922.93	2952	7919.55	5508.68	5826.9	2596.88	4407.92	7543.25	6014.78
P17174	Aspartate aminotransferase, cytoplasmic	0.607838	0.0499976	1604.08	1586.25	1511.55	2097.35	2463.81	3916.12	5414.35	1852.87	2382.39	5574.73	3892.66	2731.78	1882.2	2931.26	6277.49	5921.15
P19404	NADH dehydrogenase [ubiquinone] flavoprotein 2, mitochondrial	1.52314	0.00109821	28807.1	17717.9	17057.7	29970.6	19823.7	19234.8	20443.9	22457.7	20358.4	14422.8	14508.8	16189.6	13177.1	11814.8	13916.3	15990.9
P21399	Cytoplasmic aconitate hydratase	0.45816	0.0041733	1366.95	2038.83	2952.39	1159.34	5064.36	4974.24	6887.75	2724.12	3667.16	11315.9	7965.47	3551.9	5037.08	5721.74	10314	8440.08
P21741	Midkine	0.650273	0.0442429	2440.97	4454.11	1887.44	1955.43	2625.58	3592.02	4697.03	3246.17	697.689	5193.34	6138.08	4772.94	1938.91	5637.74	3372.11	3562.26
P22090	40S ribosomal protein S4, Y isoform 1	2.13828	0.0207769	3243.7	2544.03	3466.9	8615.95	4209.14	10306.2	6292.4	3589.54	4340.33	1417.31	1659.25	2243.74	2296.18	2158.95	3291.07	3886.79
P22392	Nucleoside diphosphate kinase B	0.601473	0.0382702	7860.93	10373.1	8410.84	12100.4	12308.7	14724.8	18572.5	11270.1	15281	19252.4	12945.6	13398.2	41836.9	19334.1	14225.3	22417.8
P22570	NADPH:adrenodoxin oxidoreductase, mitochondrial	0.634878	0.0226034	4122.19	2572.82	3544.94	2751.82	5735.9	5985.72	5892.75	5677.53	6778.48	5860.89	4631.71	6940.54	8428.55	12998.9	7763.61	6130.49
P23297	Protein S100-A1	0.442714	0.0413501	261.143	28811.2	3341.32	644.573	13265.8	8168.27	3250.06	3789.41	6758.16	31669.2	22730.4	9530.8	17903.4	12524.4	13152.1	12464.1
P24043	Laminin subunit alpha-2	2.2771	0.0203944	11186.5	4672.5	7626.29	2681.05	7086.02	2028.65	2912.05	10298.5	6141.85	3389.32	4469.76	1880.64	2871.21	2284.97	2332.77	1432.19
P25391	Laminin subunit alpha-1	2.21778	0.019052	14325.1	12982.2	11161.2	3532.99	6492.99	4022.12	2914.79	10668.1	9182.34	3970.19	6165.87	2987.59	5933.82	3722.95	2469.15	1151.86
P25940	Collagen alpha-3(V) chain	2.24797	0.0483273	16484.5	12527.1	13685.8	2749.94	4891.87	4765.31	3436.48	12173.9	3476.85	4004.77	2979.6	4984.6	6582.37	2254.62	2764.25	2099.46
P26440	Isovaleryl-CoA dehydrogenase, mitochondrial	0.606129	0.00465415	5247.31	4138.43	4257.66	2998.35	4547	2719.36	7238.39	5453.93	6796.66	9323.72	5602.67	5190.48	11088.7	8627.09	9276.21	6577.88
P28482	Mitogen-activated protein kinase 1	0.663675	0.019015	4875.87	6398.02	7773.87	3730.65	7318.05	11160.6	9712.28	5046.92	4068.92	13183.9	11551.1	8142.34	5903.19	9263.14	10372.7	11999.1
P28906	Hematopoietic progenitor cell antigen CD34	1.57801	0.0240477	3877.79	2162.76	5976.76	2477.21	3958.37	2079.92	3214.23	3967.16	4584.99	2382.28	1780.05	1712.23	3074.16	1547.04	2807.33	2616.69
P29218	Inositol monophosphatase 1	0.607196	0.0466435	1773.78	3148.32	2383.49	1884.05	3649.12	3578.65	6387.02	3033.75	1165.62	7106.09	5592.03	2912.86	2901.34	5819.32	2821.9	7436.52
P29401	Transketolase	0.555665	0.0240747	2648.01	2914.44	5700.01	2730.93	7023.88	8130.22	15617.2	7983.64	4583.07	14669	13797.3	8482.39	6096.4	8955.33	11344.8	16902.9
P30046	D-dopachrome decarboxylase	0.554524	0.0271561	1777.86	2944.65	3711.35	4991.92	10722.4	9576.8	12142.6	3865.79	3329.06	15213.8	10583.3	8532.31	5447.26	8183.79	10624.6	15840.5
P31153	S-adenosylmethionine synthase isoform type-2	0.661932	0.037572	3219.47	9686.9	6630.14	2486.01	9214.07	8233.49	12921.3	7123.37	5272.71	11013.4	12626	9012.79	6584.44	8453.08	13242.9	15193.4
P31751	RAC-beta serine/threonine-protein kinase	0.341257	0.0030618	299.806	1072.94	602.085	273.301	938.17	1496.47	2084.68	367.702	1342.57	2440.49	2727.15	4903.91	571.645	1846.22	3438.02	3394.62
P31949	Protein S100-A11	0.502211	0.00583481	7635.53	17639.6	6416.48	3214.42	27182.6	11090.8	25646.1	15315.3	6900.34	27986.3	27158	38884.2	16234.2	25386	19952.3	31856.3
P35270	Sepiapterin reductase	0.461508	0.0335946	2135.43	650.536	1606.18	519.641	4297.48	2924.73	4097.51	2338.81	3072.45	6065.82	2422.44	2247.02	3456.62	3677.79	11238.5	7366.32
P35527	Keratin, type I cytoskeletal 9	2.37735	0.0188911	14539.9	5812.05	10468.6	28224.9	14560	21696.5	8269.78	11994.2	5957.39	9914.92	6776.25	3578.62	7658.57	3128.02	4855.51	3845.88
P35908	Keratin, type II cytoskeletal 2 epidermal	2.2546	0.00592301	6951.84	9879.02	7589.78	7905.01	9087.38	10289.2	10228.1	11641.6	2068.03	9451.4	3053.34	978.352	5694.45	1516.81	2712.7	2686.73
P36222	Chitinase-3-like protein 1	0.411933	0.0420891	4503.1	241.009	2111.9	1012.32	2838.23	914.101	637.119	2665.01	5813.04	2352.08	11215	8865.11	1635.28	8109.69	5394.61	1579.92
P36871	Phosphoglucomutase-1	0.492125	0.00970665	1844.36	2044.42	3102.75	1794.47	4947.91	5529.56	7305.91	2987.82	3478.27	9485.09	7033.15	4492.15	3358.55	6046.18	12345.6	9450.14
P40926	Malate dehydrogenase, mitochondrial	0.666518	0.0324528	19386.6	8063.68	8722.59	25931.6	17215.2	23823.6	36450.5	17934.1	11125	35241.6	21868.4	19607.4	30554	29831.4	27032.4	32670.6
P41250	Glycine--tRNA ligase	0.641213	0.0377423	1276.42	3310.44	1862.14	1700.1	3446.6	3629.87	7122.36	3307.32	2097.66	5438.85	4662.99	4444.11	3803.24	4949.64	3629.34	6735.55
P46926	Glucosamine-6-phosphate isomerase 1	0.583364	0.0257136	2334.07	1906.7	2759.11	2888.48	4711.32	6356.6	9630.16	3790.75	2885.53	8593.38	5440.48	4796.16	4918.96	6771.08	10344.4	8816.56
P48637	Glutathione synthetase	0.587515	0.0189647	2073.27	1863.09	2533.74	2149.79	4147.7	4353.69	6319.41	3183.11	1782.18	7386.52	5182.19	4670.18	2596.19	3810.37	7115.94	6843.67
P51689	Arylsulfatase D	0.62573	0.0223271	2837.64	3389.01	2457.34	1615.65	3318.15	2192.37	1918.68	2716.84	3044.9	3590.3	6329.61	3436.49	6234.68	4975.95	2209.16	2422.45
P52435;Q9GZM3;Q9H1A7	DNA-directed RNA polymerase II subunit RPB11-a;DNA-directed RNA polymerase II subunit RPB11-b1;DNA-directed RNA polymerase II subunit RPB11-b2	1.55327	0.0266401	4241.24	4605.37	3720.98	6650.8	3365.57	6954.98	2690.73	2412.14	3821.99	3261.01	2295.35	2725.56	3012.84	2621.89	2627.65	2715.9
P54819	Adenylate kinase 2, mitochondrial	0.58814	0.00101046	5459.12	5891.89	3864.53	4311.46	6655.02	8106.55	9797.44	4341.2	4662.18	13198.5	7371.04	8326.58	10301.4	11570.9	9046.54	10392.3
P55268	Laminin subunit beta-2	1.92061	0.0150342	41014.5	28634.1	24278	14313.3	18644.7	15596.4	8539.15	26831.1	28125	11588.2	16517.1	8313.17	12973.7	11089.8	17418.5	5512.66
P57087	Junctional adhesion molecule B	1.79982	0.043679	15233.9	8989.74	18264.6	11905.6	5623.08	5387.14	5330.82	4680.58	9105.55	6756.03	6123.85	5352.33	5240.69	3364.3	4673.71	5014.23
P57740	Nuclear pore complex protein Nup107	1.53511	0.0366123	5577.04	3177.79	3638.05	7978.48	2858.2	4112.42	3593.71	3511.65	3199.45	2247.19	2593.38	3215.82	3076.9	2698.62	2357.1	2885.05
P60660	Myosin light polypeptide 6	1.55952	0.0114589	82865	50620.2	41515.2	67184.2	49546.3	55452.2	36346.9	53317.7	36956.2	29920.6	38075.2	36072.2	25608.9	26240.1	52413.4	27969.3
P61457	Pterin-4-alpha-carbinolamine dehydratase	0.548342	0.0216335	5962.2	5367.42	5347.97	1551.61	8046.44	2923.54	13166	4505.3	3124.5	15873.2	11512.8	7954.84	4622.24	7949.12	11527.1	11474.3
P61916	NPC intracellular cholesterol transporter 2	0.489199	0.0269892	6841.86	19973.3	14895.5	10389.5	13798.5	8488.56	10573	16095.5	7595.93	46161.1	41658.4	23089.6	22270	22354.8	7995.67	9215.66
P61970	Nuclear transport factor 2	0.588889	0.0437453	3082.45	1614.92	2228.91	6395.74	6551.25	6818.36	10865	3302.6	3184.19	10270.3	8005.85	6623.66	3117.11	6671.49	11921.2	11560.9
P62070	Ras-related protein R-Ras2	1.64108	0.0241717	4691.39	4266.06	4818.66	2254.18	1568.07	4595.78	3269.24	3669.29	4620.67	2050.86	3654.17	1583.93	3109.32	3308.94	521.608	1768.26
P62877	E3 ubiquitin-protein ligase RBX1	1.63358	0.0347096	11510.3	11169.4	16200.7	6542.68	8849.59	10984.3	11354.4	8336.52	3059.92	5083.12	5096.35	6516.1	4319.48	6889.93	3204.9	10792.2
P80404	4-aminobutyrate aminotransferase, mitochondrial	0.500085	0.0145755	2060.34	2424.66	2962.08	1579.27	4007.57	2018.34	7454.64	3794.68	7169.61	7724.55	5846.86	3352.38	12645.4	7847.66	9881.68	4758.91
P83916	Chromobox protein homolog 1	1.50056	0.000388233	12044.4	9708.51	9192.1	13771.8	8099.86	10860.7	8887.36	10035.1	10513.2	5935.35	5861.86	7837.55	6574.52	6875.18	6418.79	8759.62
P99999	Cytochrome c	0.554094	0.02355	2851.51	1630.38	2042.04	4367.04	7287.56	7715.29	14906.7	6009.86	9048.77	16343.2	7043.16	7636.04	9740.75	13292.8	10169.5	14183.7
Q01974	Tyrosine-protein kinase transmembrane receptor ROR2	1.57719	0.0226886	2182.48	2326.14	3088.41	2816.85	1219.47	2973.53	2089.34	2259.58	4250.3	1964.46	1198.19	1034.64	1885.64	1707.84	2538.65	1114.46
Q03154	Aminoacylase-1	0.512437	0.00573907	1893.03	3100.45	4993.38	169.877	4428.66	3896.11	5674.57	3112.54	2270.48	9811.03	8385.04	4488.71	3902.88	5549.94	7202.33	5494.59
Q04917	14-3-3 protein eta	0.61278	0.0238603	1890.55	3880.55	2771.49	2933.32	5411.88	7829.49	8322.2	3793.14	3147.67	6760.6	7664.76	5933.72	4482.85	6414.52	8467.77	11021.2
Q04941	Proteolipid protein 2	1.70622	0.0255867	13282.7	11250.7	9617.75	23269.8	14956.1	18519.1	8891.48	22453.9	25993.3	6187.42	3684.2	12337.9	12431.2	14795	9149.3	8987.44
Q08257	Quinone oxidoreductase	0.524855	0.00444655	3712.37	2994.39	4849.03	2810.7	10642.3	7211.26	6333.2	4765.26	8334.05	12513.8	9335.3	9083.65	6808.67	9836.32	17855.8	11109.8
Q13126	S-methyl-5'-thioadenosine phosphorylase	0.635318	0.0302797	1014.83	2971.71	2794.44	2083.75	3978.89	4025.13	6375.14	2592.44	1457.25	6282.32	5423.72	4032.32	3011.26	4107.05	4691.18	5865.88
Q13203	Myosin-binding protein H	2.19553	0.0195901	15134.2	5104.31	6058.29	7507.05	6544.1	6994.35	6809.13	16407.3	10825.3	4137.24	4311.43	1381.43	1797.3	3373.47	10564.8	3264.96
Q13683	Integrin alpha-7	1.54528	0.045755	14320.4	10130	7060.6	11478.4	7077.62	4983.35	4377.04	7597.44	8528.83	4785.64	4315.98	7031.94	4837.18	4007.21	8981.46	4068.66
Q13825	Methylglutaconyl-CoA hydratase, mitochondrial	0.627925	0.0364382	4439.56	2929.19	3641.42	2049.95	4604.47	2606.73	9220.45	5407.96	7386.85	9300.07	5009.56	4697.47	11785.6	7326.69	7184.19	7074.62
Q14112	Nidogen-2	2.00595	0.0201002	89215.3	51548.8	60714.7	32737.4	47226.9	17852.6	16096.1	64228.6	56370.1	22661.3	34501.9	24226.3	16628.3	27833	30954.5	12243.7
Q14195	Dihydropyrimidinase-related protein 3	0.606318	0.0403643	5376.97	9533.82	6870.64	3668.29	21229.7	8378.32	15515.1	10643	5851.16	19138.9	21694.2	12868.7	10328.8	12035.4	23828.6	11794
Q14232	Translation initiation factor eIF-2B subunit alpha	0.532003	0.0418614	959.569	1116.26	476.484	1452.64	1617.07	3293.7	3382.37	669.599	927.457	3733.21	2153.27	1676.78	2209.33	2833.78	2128.06	5580
Q14515	SPARC-like protein 1	1.67803	0.0452803	5664.46	4968.07	1997.14	2876.31	3409.35	3027.76	1017.3	4160.04	2535.77	2419.65	2179.58	1414.06	1908.78	2717.72	2526.12	579.901
Q15418	Ribosomal protein S6 kinase alpha-1	0.631067	0.0303058	1242.92	1570.3	746.738	1055.79	1939.44	1907.95	1976.71	1356.42	1925.9	2113.57	1960.76	831.479	1908.55	3098.53	3353.76	3645.67
Q16363	Laminin subunit alpha-4	1.80707	0.0117182	31535.6	24259.5	18811.5	16520.9	17456.5	15120.1	7562.45	28415.4	18555.6	10484.7	17613.8	9747.21	9369.62	9240.96	14537.1	5721.47
Q16563	Synaptophysin-like protein 1	1.57527	0.0297926	29364.8	33170.4	32113.8	42847.3	18385.6	29434.8	14112.2	22035.5	46849	19126.4	11316.3	13914.6	28490.9	23292.3	20130.9	16206.3
Q16602	Calcitonin gene-related peptide type 1 receptor	1.57129	0.0377305	9249.75	7093.22	5015.46	5517.58	3538.39	2439.13	3033.48	5386.52	4856.98	3057.91	3043.21	3864.12	3818.31	3053.9	2758.48	3238.37
Q16762	Thiosulfate sulfurtransferase	0.495142	0.00330141	1465.48	504.276	2844.82	1790.73	5242.71	4779.77	5030.71	1989.47	3641.4	6721.29	3595.65	3864.71	6064.02	6971.39	7866.29	7783.27
Q16787	Laminin subunit alpha-3	2.13491	0.0440994	13169.2	4585.33	5155.4	9074.63	3378.2	2334.07	2261.34	6428.84	4297.1	2319.73	2727.13	3132.63	2314.32	3377.87	2200.09	2393.12
Q16798	NADP-dependent malic enzyme, mitochondrial	0.620425	0.00856146	1623.92	832.643	932.976	608.228	915.369	910.994	1966.55	1706.35	1689.21	2068.24	1847.48	1950.05	1945.16	2498.27	2607.05	1107.07
Q3TTY5	Keratin, type II cytoskeletal 2 epidermal	2.4925	0.000462988	26632.8	25905	30249	43056.3	31727.8	41497.7	40016.4	43229.1	12596.2	22232.7	12545.6	5508.32	13084.2	7385.87	15606.5	15662.6
Q4KMP7	TBC1 domain family member 10B	2.6105	0.025786	60904.9	26661.8	45866	86548.8	19711.6	60584.5	12960.8	25606.3	17977.6	17145.3	23252.1	10614.3	21148.5	13571.3	15511.2	5069.58
Q4V9L6	Transmembrane protein 119	2.14331	0.0106879	28813.5	10382.7	35236.1	24966.4	6364.19	12861	18878.9	26424.5	20542.1	6691.57	11003.8	13079	12228.8	9908.99	4432.84	9596.55
Q5TZA2	Rootletin	1.51153	0.0214554	8210.9	7426.57	5693.76	4722.83	4553.7	2940.86	3197.39	5385.74	5619.59	3575.87	3217.72	3823.86	4649.53	3298.74	3417.15	2588.17
Q6NVY1	3-hydroxyisobutyryl-CoA hydrolase, mitochondrial	0.570939	0.00787842	1965.65	2305.24	1278.47	1792.36	3330.42	3160.68	3354.98	2471.72	4279.74	4582.39	2657	2509.49	6180.43	5053.81	6833.64	4795.16
Q6P1X6	UPF0598 protein C8orf82	0.648865	0.0450262	4008.15	2444.79	2271.35	2332.61	5359.25	4710.65	8989.82	3742.97	4812.9	4570.79	4024.48	4751.28	7798.15	8449.25	9013.03	7748.77
Q6P587	Acylpyruvase FAHD1, mitochondrial	0.551336	0.0166906	2712.25	1195.11	1262.64	4086.47	5119.55	2145.4	5671.01	3558.94	3118.06	6835.91	4948.41	3568.03	8290.34	9071.79	3325.5	4686.5
Q6PCB0	von Willebrand factor A domain-containing protein 1	1.8769	0.0109918	28710.9	33253.9	38807.8	20061.2	19024.6	14473.1	10891.9	29950.1	18837	16048.5	19787.3	10769.5	14110.1	9258.03	9574.93	9136.76
Q6YP21	Kynurenine--oxoglutarate transaminase 3	0.508085	0.00338357	1022.73	2136.38	699.668	3795.34	1861.99	1717.63	3956.08	1496.92	1472.43	5371.76	4009.08	4811	3182.33	3867.83	2193.12	4362.96
Q7Z3B1	Neuronal growth regulator 1	1.7935	0.0268144	3331.79	3749.84	8393.12	4403.37	2388.47	5296.86	3743.51	3776.98	7196.88	2462.08	1425.61	1878.32	3219.61	1299.67	3444.21	4606.18
Q7Z7K6	Centromere protein V	1.54377	0.034883	8063.48	6965.36	8369.88	4901.76	8402.44	5950.73	3280.36	6362.96	7002.03	3535.21	2632.79	2984.25	2537.15	4897.33	9059.65	4229.52
Q8IWA5	Choline transporter-like protein 2	2.02857	0.0275426	7480.91	6736.83	5728.79	2852.24	2661.19	2052.44	1490.53	3961.1	7072.96	2519.13	2812.08	2000.89	1871.53	2718.27	2601.87	826.846
Q8IXJ6	NAD-dependent protein deacetylase sirtuin-2	0.634271	0.0445278	3193.52	2760.51	1817.12	2619.3	3238.87	2102.52	6331.62	2997.06	2878.5	2654.85	3166.44	5238	8485.91	4037.08	5887.26	4790.78
Q8IZF2	Adhesion G protein-coupled receptor F5	1.71291	0.0450054	15316.7	9499.34	6958.23	9794.15	7654.8	4194.78	4995.25	6510.15	4854.49	4591.96	7413.75	5966.17	3672.06	5629.18	2036.09	2374.73
Q8N3F8	MICAL-like protein 1	2.39138	0.0369886	16742.5	5413.72	14530.8	12024.6	4860.62	9168.75	1274.59	4488.75	6065.6	4619.25	6127.82	3497.52	5589.35	305.217	1580.96	2533.22
Q8N3U4	Cohesin subunit SA-2	1.53348	0.020589	1703.34	2555.06	2030.14	3494.87	1797.09	2598.08	2283.88	1855.69	1610.32	1083.17	852.823	2316.79	979.238	1210.38	1588.98	2076.28
Q8N4T8	Carbonyl reductase family member 4	0.603434	0.049041	1774.09	1099.51	1034.5	3127.3	1686.96	2193.98	6255.4	2091.08	4079.16	4557.8	2280.93	3251.33	5664.78	5536.33	3102.06	5692.68
Q8NCW5	NAD(P)H-hydrate epimerase	0.552806	0.00829748	4219.64	2988.82	4704.54	2918.12	6402.18	6485.32	12747.2	4671.51	4567.93	14302.9	8564.64	5332.08	9918.54	9556.59	11605	10653.7
Q8NFU3	Thiosulfate:glutathione sulfurtransferase	0.588871	0.0240199	9422.1	5073.1	3341.13	1920.79	14988.9	11293.7	11742.4	6293.03	6627.6	16172.5	19292.9	7239.93	9469.69	10558	15022.3	15628.7
Q8NFV4	Protein ABHD11	0.471041	0.00479631	1219.99	1441.68	1756.74	1409.56	3431.4	2742.45	2898.72	1589.55	4232.19	7039.74	2332.04	2244.52	7197.59	5473.24	4996.18	4933.18
Q8TDX6	Chondroitin sulfate N-acetylgalactosaminyltransferase 1	2.80846	0.0392197	2346.48	1875.7	2945.55	4074.67	1458.17	10193.3	1947.7	3138.16	5004.54	926.498	1598.08	855.309	1196.67	1336.11	2156.03	1065.99
Q8TF68	Zinc finger protein 384	1.70265	0.0238866	3068.01	4233.85	4961.24	9244.7	4499.62	7964.66	4996.82	6452.44	3729.13	2021.93	3310.12	2493.41	1819.58	3159.63	5650.72	3996.7
Q92626	Peroxidasin homolog	2.40712	0.0155752	6868.64	8476.68	5499.16	7941.58	5141.95	2762.98	5700.27	16111.7	6486.39	4176.62	6353.59	2004.56	3188.43	1928.07	1855.56	1492.23
Q96AB3	Isochorismatase domain-containing protein 2	0.639968	0.0239999	2987.93	1427.07	2420.67	4073.75	2939.7	3109.58	7965.04	4163.49	5235.54	7005.34	4959.13	4188.17	6909.08	7499.32	4627.9	6524.87
Q96II8	Leucine-rich repeat and calponin homology domain-containing protein 3	2.82022	0.0161204	14251.8	9614.28	5670.53	6766.94	1891.61	8973.46	3245.05	9725.07	3914.17	855.726	606.499	1270.88	281.745	3743.59	4543.61	6362.86
Q96ND0	Protein FAM210A	0.503694	0.0381246	1278.83	2721.09	1300.67	1766.06	1539.05	1201.68	601.368	1068.4	795.501	2896.34	1778.87	1656.05	6224.14	1770.44	2740.68	1884.25
Q96TA1	Niban-like protein 1	0.622144	0.0243649	1517.96	4013.34	2732.12	810.985	4591.6	2277.86	3256.35	2509.54	2190.48	4854.19	5629.06	2960.53	2598.19	4075.49	6297.13	3464.48
Q99807	5-demethoxyubiquinone hydroxylase, mitochondrial	1.59511	0.0297403	2533.96	1626.31	1580.49	3341.64	2034.13	1097.72	1478.81	1958.97	1294.57	738.07	1361.46	1764.93	1354.95	1198.93	764.7	1080.15
Q9BPY8	Homeodomain-only protein	0.544969	0.00448895	3816.71	4223.6	1796.18	1158.56	4653.55	1216.28	2816.29	3129.11	1516.14	5951.17	5195.43	4324.06	3754.79	7326.4	4373.56	3793.13
Q9BQ69	ADP-ribose glycohydrolase MACROD1	0.556866	0.0466686	1170.08	5712	1661.02	1050.98	6815.72	3030.02	5215.44	2272.34	6330.8	7691.08	3498.77	2568.28	7111.15	6025.9	11930.1	7626.93
Q9BSH5	Haloacid dehalogenase-like hydrolase domain-containing protein 3	0.629052	0.0155529	3863.15	1311.12	2819.09	2968.84	4052.48	3100.55	4426.19	3487.13	4226.11	8841.99	3282.49	3540.2	6150.1	5902.06	4981.7	4709.16
Q9BUB7	Transmembrane protein 70, mitochondrial	0.513199	0.0484576	2210.95	3048.26	2418.28	2998.5	2564.57	1707.42	3160.74	1856.61	2920.79	3498.99	5912.98	2256.12	11124.3	6811.96	1343.11	3737.49
Q9BX68	Histidine triad nucleotide-binding protein 2, mitochondrial	0.628338	0.0471513	1739.19	1873.84	1929.4	4428.79	6794.26	6635.63	11440.5	4879.83	7131.21	11310	6248.19	5087.18	7696.18	8249.04	9085.72	10319.4
Q9BY32	Inosine triphosphate pyrophosphatase	0.581259	0.040182	2058.77	6752.97	4329.07	3572.8	9419.09	9172.43	11591	2187.18	4933.66	8451.24	6053.95	9931.56	7795.24	10530.2	19252.5	10264.9
Q9BYT8	Neurolysin, mitochondrial	0.59767	0.0226152	2160.94	1818.71	1958.76	1466.58	1580.63	2061.2	2289.68	1314.29	645.838	3103.76	2388.1	1757.34	4430.62	4303.77	1175.1	2747.59
Q9H0E3	Histone deacetylase complex subunit SAP130	1.66655	0.0195051	3065.69	7763.38	3612.92	4903	5725.23	5046.51	6238.54	2706.02	4372.76	1788.32	3257.31	3984.02	931.051	2546.58	3492.42	4270.93
Q9H2U2	Inorganic pyrophosphatase 2, mitochondrial	0.642195	0.0267653	3166.58	5591.57	2107.26	6229.36	4375.82	5579.35	8017.98	4667.48	7284.34	9694.09	5464.03	6051.47	12121.3	11021	5048.73	7546.21
Q9H6R3	Acyl-CoA synthetase short-chain family member 3, mitochondrial	0.579547	0.0232004	2376.35	1481.63	1902.87	1737.62	1554.53	697.488	3001.44	1280.9	3400.17	4489.09	4790.28	1900.62	4821.74	3191.82	1823.18	2379.11
Q9H8L6	Multimerin-2	1.56046	0.0156506	11027.1	7430.08	9242.54	8890.86	6043.97	3449.53	4309.89	7010.25	7940.6	3940.15	3663.29	5015.54	4732.1	4220.79	5882.65	5115.19
Q9NP92	39S ribosomal protein S30, mitochondrial	0.573414	0.0107856	965.159	692.362	681.856	2804.69	901.87	1524.09	1905.25	1427.39	2089.41	2779.64	2685.88	1896.8	3888.54	2321.45	2425.18	1624.98
Q9NPJ3	Acyl-coenzyme A thioesterase 13	0.582167	0.0350125	1967.17	884.548	1128.05	5673.17	2359.88	4979.04	6030.06	2148.94	2722.55	6421.8	4058.59	3349.14	8300.35	5738.64	3446.18	5951.04
Q9NRA1	Platelet-derived growth factor C	0.59084	0.0270068	2438.68	3696.39	2501.02	2499.45	2979.88	1831.88	5145.71	3669.83	2641.45	5535.52	8454.71	3427.4	4094.71	2839.79	3530.95	8191.74
Q9NTX5	Ethylmalonyl-CoA decarboxylase	0.597949	0.0182376	2843.15	1778.9	1547.46	4266.11	4101.08	6209.78	8628.67	3028.32	2673.32	6498.4	4848.49	4925.97	8371.29	6801.94	6027.67	8152.11
Q9NUV7	Serine palmitoyltransferase 3	0.59127	0.022723	1590.67	1771.17	1098.36	485.547	1042.12	478.929	477.87	1121.6	1011.01	1799.53	1927.4	999.198	2770.47	2020.65	1346.11	1077.2
Q9UBB4	Ataxin-10	1.90932	0.0110889	12496.6	7719.64	10919.8	5921.77	4846.9	6585.56	5150.56	10140.4	3303.42	4443.45	3541.31	3183.57	3551.71	3114.25	4057.92	5435.28
Q9UIJ7	GTP:AMP phosphotransferase AK3, mitochondrial	0.616157	0.0103288	3702.75	2388.06	2007.35	3447.03	7267.96	6185.8	7262.84	4034.3	5463.15	9765.03	5073.3	5939.74	7776.9	7373.09	10108.9	6675.9
Q9UK22	F-box only protein 2	0.52683	0.00643704	1841.12	4687.71	3162.25	2563.92	6124.59	3051.47	2991.01	1732.09	2725.19	10284.5	4814.62	6898.68	5398.06	7000.05	3707.51	4532.17
Q9UKK9	ADP-sugar pyrophosphatase	0.625585	0.0210426	1687.6	4887.82	4102.15	4091.34	6200.14	6200.82	10753.1	4876.72	3295.08	8832.76	8872.15	6777.67	9110.5	6432.39	5632.19	11651
Q9UKU7	Isobutyryl-CoA dehydrogenase, mitochondrial	0.589147	0.0286612	2300.3	1538.91	1632.98	2957.23	2430.53	2758.17	6620.48	3543.7	4227.69	5664.31	3515.96	3020.18	9178.54	5717.52	4960.08	4921.52
Q9UMS0	NFU1 iron-sulfur cluster scaffold homolog, mitochondrial	0.633301	0.0282661	6063.08	6225.81	3123.8	6168.4	8183.63	980.887	13330.7	5905.87	8428.17	9611.05	9552.16	7960.46	8841.55	8948.26	11906.6	14915.6
Q9UMX5	Neudesin	1.5784	0.00842786	14558.7	11188.6	13577.1	7738.5	9740.29	8052.97	12793	15772.1	16141.8	5997.27	12276	6311.71	9777.62	7332.13	5251.94	7041.88
Q9Y2H0	Disks large-associated protein 4	1.8106	0.0301901	30637	39326.8	54398.3	19088.8	26441.2	18627.7	16928.5	17152.8	19299.9	14367.2	18571.8	18816.1	9801.46	16230.6	11954.9	14171
Q9Y3E1	Hepatoma-derived growth factor-related protein 3	0.596257	0.0305047	1044.32	7309.6	6575.75	3934.73	8804.16	5735.78	14408.7	6731.33	4082.84	15372.2	12576.3	9868.14	4989.35	10311.3	9077.52	14280.5
Q9Y478	5'-AMP-activated protein kinase subunit beta-1	0.664404	0.0341141	1055.82	1155.37	1401.12	1086.68	1151.88	1047.27	738.567	984.975	2802.28	1764.6	1691.2	1969.37	1590.23	2848.75	2001.72	1507.47
